# Supplementary material
Source: publisher site journal article supplement (https://www.dovepress.com/get_supplementary_file.php?f=391369.docx)
Supplement: Supplementary file 1 [file get_supplementary_file.php]

**Supplementary Table 1** Factor loadings of dietary patterns

| Variable | Pattern 1 | Pattern 2 | Pattern 3 |
| --- | --- | --- | --- |
| Chicken/meat fish mixed dish | 0.67 |  | 0.22 |
| Biryani | 0.58 |  | 0.32 |
| White rice | 0.53 |  |  |
| Arabic/Iranian bread | 0.52 | 0.21 |  |
| Soups/starters | 0.51 | 0.40 | 0.23 |
| Chicken | 0.50 |  |  |
| Red meat | 0.49 |  |  |
| Zaatar fatayer | 0.49 |  |  |
| Salad and cooked vegetables | 0.43 | 0.43 |  |
| Eggs | 0.34 | 0.21 |  |
| Potato | 0.33 |  | 0.32 |
| Other bread | 0.30 |  | 0.26 |
| Fresh fruit |  | 0.67 |  |
| Salad and raw vegetables | 0.27 | 0.62 |  |
| Canned/dried fruit and dates |  | 0.61 |  |
| Brown bread |  | 0.48 |  |
| Grilled/fried/baked Fish | 0.31 | 0.47 |  |
| Nuts |  | 0.47 | 0.34 |
| Fresh fruit juice |  | 0.44 |  |
| Yoghurt | 0.21 | 0.44 |  |
| Fish | 0.36 | 0.42 |  |
| Breakfast Cereal |  | 0.38 | 0.32 |
| Coffee |  | 0.38 |  |
| Cheese |  | 0.38 | 0.32 |
| Milk |  | 0.38 |  |
| Milk added to cereal |  | 0.35 | 0.29 |
| Tea |  | 0.34 |  |
| Ice cream |  |  | 0.63 |
| Desserts | 0.21 | 0.23 | 0.63 |
| Fast food | 0.49 |  | 0.60 |
| Chocolate |  |  | 0.59 |
| Croissant |  |  | 0.56 |
| Soft drink | 0.42 |  | 0.45 |
| Lasagna | 0.37 |  | 0.41 |
| White bread | 0.32 |  | 0.36 |
| Asian noodle | 0.32 |  | 0.34 |
| Milk shakes |  |  | 0.31 |
| Butter | 0.20 |  | 0.23 |
| Variance explained (%) | 19.8 | 6.7 | 4.8 |

**Supplement Figure 1** Association between sociodemographic and lifestyle factors with fat mass

Values were regression coefficients (95%CI). All variables in the figure were mutually adjusted.
